# Supplementary material for: OCT4 impedes cell fate redirection by the melanocyte lineage master regulator MITF in mouse ESCs
Source: PubMed Central journal article supplement (PMC5647326; doi:10.1038/s41467-017-01122-1), 2017-10-18
Supplement: 41467_2017_1122_MOESM3_ESM.pdf [file 41467_2017_1122_MOESM3_ESM.pdf]

## **Description of Additional Supplementary Files**

File Name: Supplementary Data 1

Description: Differential gene expression, Related to Figure 2 d.

File Name: Supplementary Data 2

Description: Gene expression\_BioGPS, Related to Figure 3 d.

File Name: Supplementary Data 3

Description: Oct4\_lineage TFs\_overlapping genes, Related to Figure 5 b.

File Name: Supplementary Data 4

Description: Oct4\_lineage TFs\_nonoverlapping genes, Related to Figure 5 b.

File Name: Supplementary Data 5

Description: MITF, E2F7 and P53 overlapped genes, Related to Supplementary Figure 4 a-d.

File Name: Supplementary Data 6

Description: OCT4\_MITF\_Shared domains, Related to Figure 5 f.

File Name: Supplementary Data 7

Description: Enhancers\_MITF with OCT4, P53, Related to Figure 4 g.

File Name: Supplementary Data 8

Description: GO\_SOX2\_MITF\_HES1\_GATA4\_CD\_X2, Related to Discussion.

File Name: Supplementary Data 9

Description: GO\_NANOG\_MITF\_HES1\_GATA4\_CD\_X2, Related to Discussion.
